# Supplementary material for: Multifunctional polyimide-based femtosecond laser micro/nanostructured films with triple Janus properties
Source: Royal Society of Chemistry journal article supplement (doi:10.1039/d3nr03701k), 2023-01-01
Supplement: d3nr03701k1.pdf [file d3nr03701k1.pdf]

Electronic Supplementary Material (ESI) for Nanoscale.  
This journal is © The Royal Society of Chemistry 2023

# **Multifunctional polyimide-based micro/nanostructured films with triple Janus property achieved by Femtosecond laser**

Jiaqing Pei,<sup>a</sup> Kai Yin<sup>\*a,b</sup>, Tingni Wu<sup>a</sup>, Lingxiao Wang,<sup>a</sup> Qinwen Deng<sup>a</sup>, Yin Huang,<sup>a</sup> Kai Wang<sup>c</sup>, Christopher J. Arnsch<sup>d</sup>

<sup>a</sup> *Hunan Key Laboratory of Nanophotonics and Devices, School of Physics and Electronics, Central South University, Changsha, 410083, China.*

<sup>b</sup> *State Key Laboratory of Precision Manufacturing for Extreme Service Performance, College of Mechanical and Electrical Engineering, Central South University, Changsha 410083, China.*

<sup>c</sup> *School of Electrical Engineering, Weihai Innovation Research Institute, Qingdao University, Qingdao 266000, China.*

<sup>d</sup> *Department of Desalination and Water Treatment, Zuckerberg Institute for Water Research, the Jacob Blaustein Institutes for Desert Research, Ben-Gurion University of the Negev, Sede-Boqer Campus, Midreshet Ben-Gurion 84990, Israel*

This file contains Supplementary Experimental Section, Figures S1-S10.

\*To whom correspondence should be addressed.

\*Corresponding author: kaiyin@csu.edu.cn

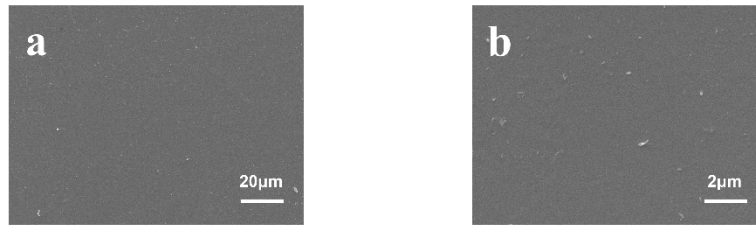

**Figure S1.** SEM images of pristine PI surface.

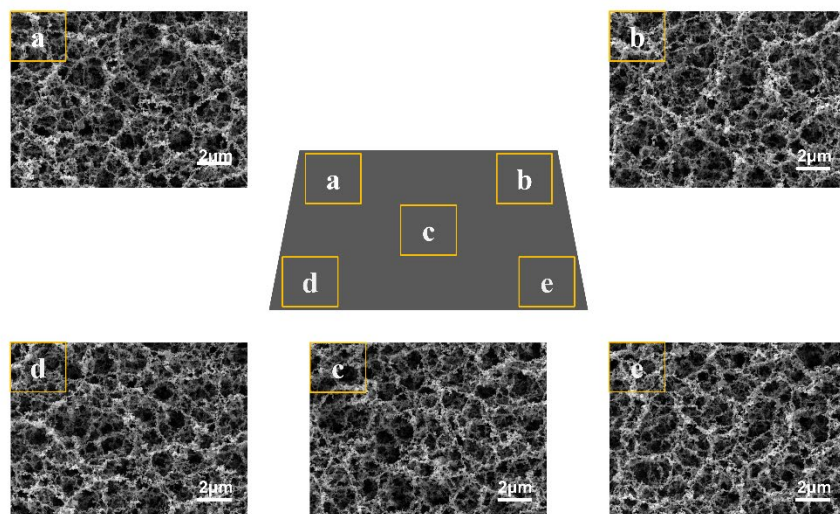

**Figure S2.** SEM images of various positions of the HPS surface.

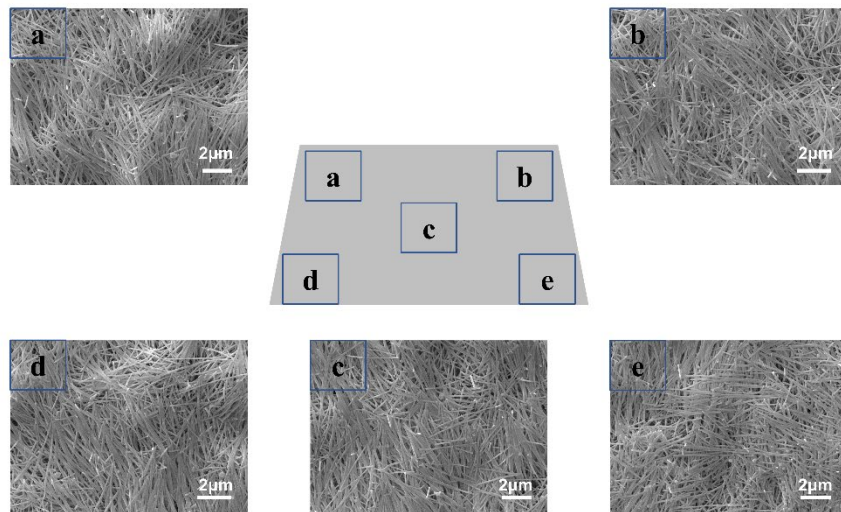

**Figure S3.** SEM images of various positions of the AGNWs@LLS surface.

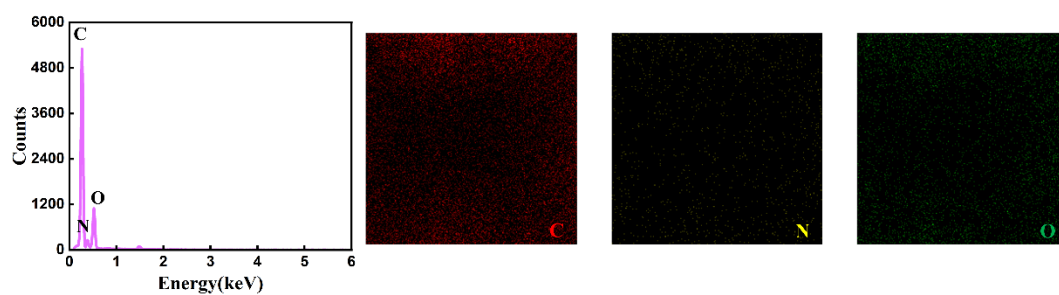

**Figure S4.** Elemental chemical composition and maps of pristine PI surface.

| <b>a</b> | Element | Weight% | Atomic% |
|----------|---------|---------|---------|
|          | C K     | 51.27   | 57.14   |
|          | N K     | 17.55   | 16.77   |
|          | O K     | 31.18   | 26.09   |

| <b>b</b> | Element | Weight% | Atomic% |
|----------|---------|---------|---------|
|          | C K     | 78.41   | 82.06   |
|          | N K     | 8.77    | 7.87    |
|          | O K     | 12.82   | 10.07   |

| <b>c</b> | Element | Weight% | Atomic% |
|----------|---------|---------|---------|
|          | C K     | 58.87   | 64.63   |
|          | N K     | 12.46   | 11.73   |
|          | O K     | 28.68   | 23.64   |

| <b>d</b> | Element | Weight% | Atomic% |
|----------|---------|---------|---------|
|          | C K     | 4.71    | 28.77   |
|          | N K     | 0.25    | 1.32    |
|          | O K     | 1.06    | 4.87    |
|          | Cl K    | 0.84    | 1.74    |
|          | Ag L    | 93.13   | 63.30   |

**Figure S5.** Elemental content of **a** pristine PI, **b** HPS, **c** LLS and **d** AGNWs@LLS surfaces.

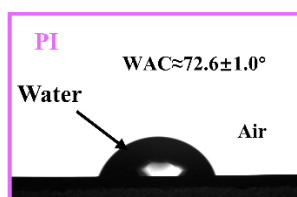

**Figure S6.** Static water contact angle of pristine PI surface.

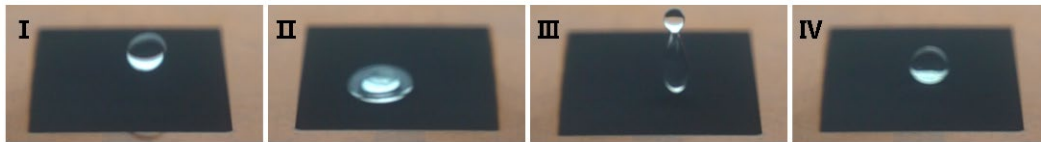

**Figure S7.** The process of water impacting the HPS surface.

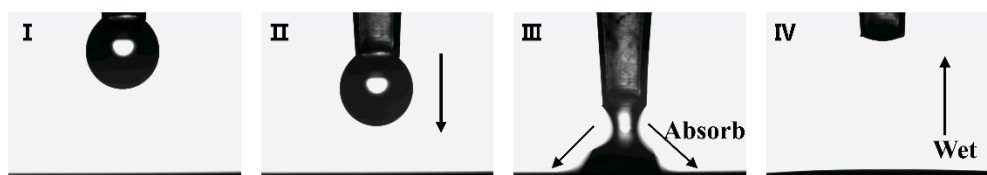

**Figure S8.** Dynamic wetting behaviors of a water droplet (3  $\mu\text{L}$ ) on LLS surface.

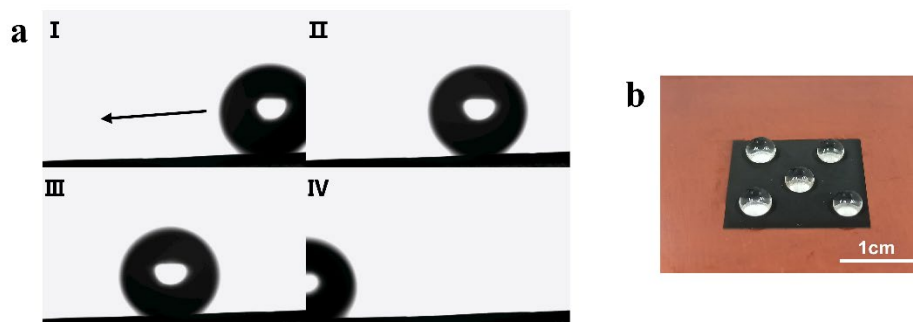

**Figure S9.** **a** A water droplet sliding on the HPS surface. **b** WACs of various positions for the HPS surface.

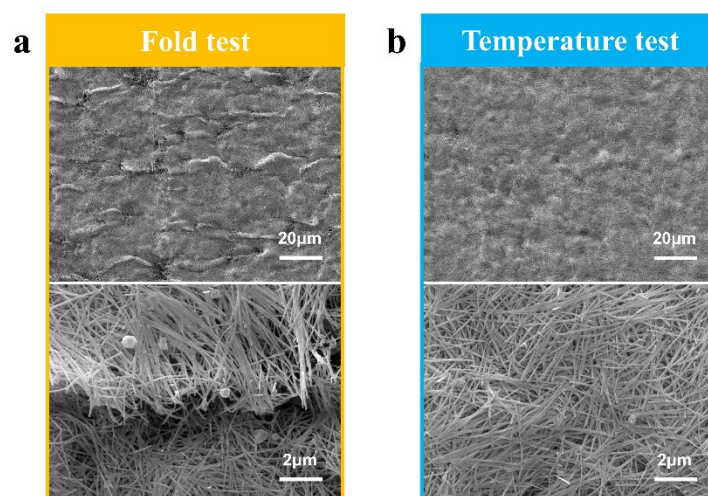

**Figure S10.** SEM images of AGNWs@LLS surface under **a** fold test and **b** temperature test.
